# Supplementary material
Source: PubMed Central journal article supplement (PMC7744839)

**Supporting Information.** Soga, M., M.J. Evans, K. Tsuchiya, and Y. Fukano. 2020. A room with a green view: the importance of nearby nature for mental health during the COVID-19 pandemic. *Ecological Applications*.

## Appendix S1

Table S1. Socio-demographic and lifestyle characteristics of the participants.

| Variable                        | <i>n</i> | %    |
|---------------------------------|----------|------|
| <i>Lifestyle variables</i>      |          |      |
| Frequency of smoking            |          |      |
| None                            | 2,408    | 80.3 |
| Less than once a month          | 12       | 0.4  |
| One or two times per month      | 8        | 0.3  |
| 2 or 3 times per month          | 9        | 0.3  |
| One or two times per week       | 34       | 1.1  |
| Three or four times per week    | 21       | 0.7  |
| Five or six times per week      | 39       | 1.3  |
| Every day                       | 469      | 15.6 |
| Frequency of drinking alcohol   |          |      |
| None                            | 1,097    | 36.6 |
| Less than once a month          | 186      | 6.2  |
| One or two times per month      | 202      | 6.7  |
| 2 or 3 times per month          | 162      | 5.4  |
| One or two times per week       | 417      | 13.9 |
| Three or four times per week    | 284      | 9.5  |
| Five or six times per week      | 225      | 7.5  |
| Every day                       | 427      | 14.2 |
| Number of working days per week |          |      |
| 0                               | 1,026    | 34.2 |
| 1                               | 29       | 1    |
| 2                               | 55       | 1.8  |
| 3                               | 87       | 2.9  |
| 4                               | 101      | 3.4  |
| 5                               | 1,066    | 35.5 |
| 6                               | 154      | 5.1  |
| 7                               | 482      | 16.1 |
| Presence of a pet in the home   |          |      |
| Presence                        | 499      | 16.6 |
| Absence                         | 2,501    | 83.4 |
| Number of children in the home  |          |      |
| None                            | 2,112    | 70.4 |
| One child                       | 411      | 13.7 |
| Two children                    | 316      | 10.5 |
| Three children                  | 100      | 3.3  |

|                         |    |     |
|-------------------------|----|-----|
| Four children           | 39 | 1.3 |
| Five children           | 22 | 0.7 |
| More than five children | 0  | 0   |

*Socio-demographic variables*

Sex

|        |       |    |
|--------|-------|----|
| Female | 1,500 | 50 |
| Male   | 1,500 | 50 |

Age

|     |     |      |
|-----|-----|------|
| 20s | 500 | 16.7 |
| 30s | 500 | 16.7 |
| 40s | 500 | 16.7 |
| 50s | 500 | 16.7 |
| 60s | 500 | 16.7 |
| 70s | 500 | 16.7 |

Annual household income

|                          |     |      |
|--------------------------|-----|------|
| Less than ¥3,000,000     | 635 | 21.2 |
| ¥3,000,000 – 5,000,000   | 788 | 26.3 |
| ¥5,000,000 – 7,000,000   | 583 | 19.4 |
| ¥7,000,000 – 10,000,000  | 509 | 17   |
| ¥10,000,000 – 15,000,000 | 322 | 10.7 |
| More than ¥15,000,000    | 163 | 5.4  |

Degree of income changes due to the COVID-19 crisis

|                                      |       |      |
|--------------------------------------|-------|------|
| Greatly increased (more than double) | 8     | 0.3  |
| Increased somewhat                   | 18    | 0.6  |
| Slightly increased                   | 114   | 3.8  |
| Generally unchanged                  | 1,802 | 60.1 |
| Slightly decreased                   | 576   | 19.2 |
| Decreased somewhat                   | 269   | 9    |
| Greatly decreased (less than half)   | 213   | 7.1  |

Housing type

|              |      |      |
|--------------|------|------|
| Owned house  | 1093 | 36.4 |
| Owned flat   | 674  | 22.5 |
| Rented house | 67   | 2.2  |
| Rented flat  | 1089 | 36.3 |
| Other        | 77   | 2.6  |

---

Table S2. Model-averaged coefficients (effect sizes) for all models below  $\Delta AIC_c = 6$  of all subsets of model that contains all of our predictor variables against the five mental health response variables. All continuous variables were scaled to enable direct comparisons.

| Variable                                       | Estimate | SE    | Lower CI | Upper CI | p-value |
|------------------------------------------------|----------|-------|----------|----------|---------|
| <i>Self-esteem</i>                             |          |       |          |          |         |
| Intercept                                      | -0.141   | 0.049 | -0.236   | -0.046   | 0.004   |
| Green view                                     | 0.127    | 0.045 | 0.039    | 0.214    | 0.005   |
| Greenspace use                                 | 0.064    | 0.017 | 0.030    | 0.098    | 0.000   |
| Neighbourhood greenness                        | 0.009    | 0.017 | -0.025   | 0.042    | 0.614   |
| Impact of COVID-19 on income                   | -0.030   | 0.017 | -0.064   | 0.004    | 0.084   |
| Income                                         | 0.150    | 0.018 | 0.115    | 0.185    | 0.000   |
| Intensity of work                              | -0.019   | 0.019 | -0.056   | 0.019    | 0.333   |
| Age                                            | 0.293    | 0.019 | 0.257    | 0.330    | 0.000   |
| Male compared to female                        | 0.092    | 0.036 | 0.022    | 0.163    | 0.010   |
| Alcohol use                                    | 0.024    | 0.018 | -0.011   | 0.059    | 0.175   |
| Smoking                                        | -0.005   | 0.018 | -0.040   | 0.029    | 0.767   |
| Number of children                             | -0.018   | 0.018 | -0.053   | 0.017    | 0.313   |
| Owning a cat or dog                            | -0.041   | 0.047 | -0.132   | 0.050    | 0.379   |
| Housing (Owned flat compared to owned house)   | -0.080   | 0.046 | -0.170   | 0.010    | 0.081   |
| Housing (Rented house compared to owned house) | 0.050    | 0.119 | -0.183   | 0.283    | 0.676   |
| Housing (Rented flat compared to owned house)  | -0.069   | 0.045 | -0.157   | 0.020    | 0.127   |
| Housing (Other compared to owned house)        | -0.110   | 0.111 | -0.328   | 0.107    | 0.321   |
| <i>Life satisfaction</i>                       |          |       |          |          |         |
| Intercept                                      | -0.072   | 0.047 | -0.165   | 0.021    | 0.129   |
| Green view                                     | 0.231    | 0.046 | 0.140    | 0.322    | 0.000   |
| Greenspace use                                 | 0.071    | 0.018 | 0.035    | 0.106    | 0.000   |
| Neighbourhood greenness                        | -0.001   | 0.018 | -0.037   | 0.034    | 0.939   |
| Impact of COVID-19 on income                   | 0.031    | 0.018 | -0.005   | 0.067    | 0.091   |
| Income                                         | 0.120    | 0.019 | 0.084    | 0.157    | 0.000   |
| Intensity of work                              | -0.023   | 0.020 | -0.061   | 0.016    | 0.248   |
| Age                                            | -0.015   | 0.019 | -0.053   | 0.024    | 0.456   |
| Male compared to female                        | -0.224   | 0.038 | -0.298   | -0.150   | 0.000   |
| Alcohol use                                    | 0.009    | 0.019 | -0.028   | 0.045    | 0.644   |
| Smoking                                        | -0.032   | 0.018 | -0.068   | 0.004    | 0.082   |
| Number of children                             | -0.001   | 0.018 | -0.037   | 0.035    | 0.960   |
| Owning a cat or dog                            | -0.023   | 0.049 | -0.118   | 0.072    | 0.636   |
| Housing (Owned flat compared to owned house)   | -0.092   | 0.048 | -0.186   | 0.003    | 0.057   |
| Housing (Rented house compared to owned house) | -0.017   | 0.124 | -0.259   | 0.226    | 0.893   |
| Housing (Rented flat compared to owned house)  | -0.001   | 0.044 | -0.087   | 0.086    | 0.991   |
| Housing (Other compared to owned house)        | -0.109   | 0.116 | -0.336   | 0.118    | 0.347   |
| <i>Happiness</i>                               |          |       |          |          |         |
| Intercept                                      | -0.027   | 0.055 | -0.135   | 0.080    | 0.619   |
| Green view                                     | 0.161    | 0.045 | 0.072    | 0.250    | 0.000   |
| Greenspace use                                 | 0.093    | 0.018 | 0.059    | 0.128    | 0.000   |
| Neighbourhood greenness                        | -0.002   | 0.018 | -0.037   | 0.033    | 0.901   |
| Impact of COVID-19 on income                   | -0.027   | 0.018 | -0.062   | 0.007    | 0.123   |
| Income                                         | 0.163    | 0.019 | 0.126    | 0.199    | 0.000   |
| Intensity of work                              | -0.025   | 0.020 | -0.063   | 0.014    | 0.210   |

|                                                |        |       |        |        |       |
|------------------------------------------------|--------|-------|--------|--------|-------|
| Age                                            | 0.173  | 0.021 | 0.133  | 0.213  | 0.000 |
| Male compared to female                        | -0.175 | 0.037 | -0.248 | -0.102 | 0.000 |
| Alcohol use                                    | 0.028  | 0.018 | -0.007 | 0.064  | 0.118 |
| Smoking                                        | -0.072 | 0.018 | -0.107 | -0.037 | 0.000 |
| Number of children                             | 0.027  | 0.018 | -0.009 | 0.062  | 0.143 |
| Owning a cat or dog                            | -0.035 | 0.048 | -0.130 | 0.059  | 0.465 |
| Housing (Owned flat compared to owned house)   | -0.066 | 0.047 | -0.158 | 0.026  | 0.157 |
| Housing (Rented house compared to owned house) | -0.076 | 0.121 | -0.313 | 0.161  | 0.531 |
| Housing (Rented flat compared to owned house)  | -0.101 | 0.046 | -0.191 | -0.011 | 0.028 |
| Housing (Other compared to owned house)        | -0.147 | 0.113 | -0.369 | 0.074  | 0.193 |
| <i>Loneliness</i>                              |        |       |        |        |       |
| Intercept                                      | -0.086 | 0.069 | -0.221 | 0.048  | 0.208 |
| Green view                                     | -0.108 | 0.046 | -0.198 | -0.019 | 0.018 |
| Greenspace use                                 | -0.077 | 0.018 | -0.112 | -0.042 | 0.000 |
| Neighbourhood greenness                        | 0.008  | 0.018 | -0.028 | 0.043  | 0.673 |
| Impact of COVID-19 on income                   | 0.022  | 0.018 | -0.013 | 0.057  | 0.221 |
| Income                                         | -0.152 | 0.019 | -0.189 | -0.115 | 0.000 |
| Intensity of work                              | 0.031  | 0.020 | -0.007 | 0.070  | 0.111 |
| Age                                            | -0.175 | 0.022 | -0.217 | -0.132 | 0.000 |
| Male compared to female                        | 0.234  | 0.037 | 0.161  | 0.308  | 0.000 |
| Alcohol use                                    | -0.050 | 0.018 | -0.085 | -0.014 | 0.006 |
| Smoking                                        | -0.015 | 0.018 | -0.050 | 0.020  | 0.401 |
| Number of children                             | -0.034 | 0.018 | -0.070 | 0.002  | 0.064 |
| Owning a cat or dog                            | 0.004  | 0.049 | -0.092 | 0.099  | 0.940 |
| Housing (Owned flat compared to owned house)   | 0.120  | 0.047 | 0.028  | 0.213  | 0.011 |
| Housing (Rented house compared to owned house) | 0.073  | 0.121 | -0.165 | 0.311  | 0.550 |
| Housing (Rented flat compared to owned house)  | 0.116  | 0.046 | 0.026  | 0.207  | 0.012 |
| Housing (Other compared to owned house)        | 0.103  | 0.114 | -0.120 | 0.326  | 0.364 |
| <i>Depression and anxiety</i>                  |        |       |        |        |       |
| Intercept                                      | 0.093  | 0.053 | -0.011 | 0.197  | 0.080 |
| Green view                                     | -0.095 | 0.046 | -0.185 | -0.005 | 0.039 |
| Greenspace use                                 | -0.053 | 0.018 | -0.088 | -0.018 | 0.003 |
| Neighbourhood greenness                        | -0.020 | 0.018 | -0.055 | 0.014  | 0.253 |
| Impact of COVID-19 on income                   | 0.076  | 0.018 | 0.040  | 0.111  | 0.000 |
| Income                                         | -0.090 | 0.018 | -0.125 | -0.054 | 0.000 |
| Intensity of work                              | 0.009  | 0.020 | -0.030 | 0.048  | 0.642 |
| Age                                            | -0.214 | 0.019 | -0.250 | -0.177 | 0.000 |
| Male compared to female                        | -0.074 | 0.037 | -0.146 | -0.002 | 0.043 |
| Alcohol use                                    | -0.017 | 0.019 | -0.053 | 0.020  | 0.367 |
| Smoking                                        | 0.038  | 0.018 | 0.003  | 0.074  | 0.035 |
| Number of children                             | 0.000  | 0.018 | -0.035 | 0.036  | 0.987 |
| Owning a cat or dog                            | -0.002 | 0.048 | -0.096 | 0.092  | 0.964 |

Figure S1. Boxplots of NDVI (scaled) for the people with a green view and those without. There was a significant relationship between green view and NDVI (Slope = 0.248, SE = 0.046,  $p < 0.0001$ ,  $F_{1,2998} = 28.63$ ,  $R^2 = 0.0092$ ), but with significant variation within each group.

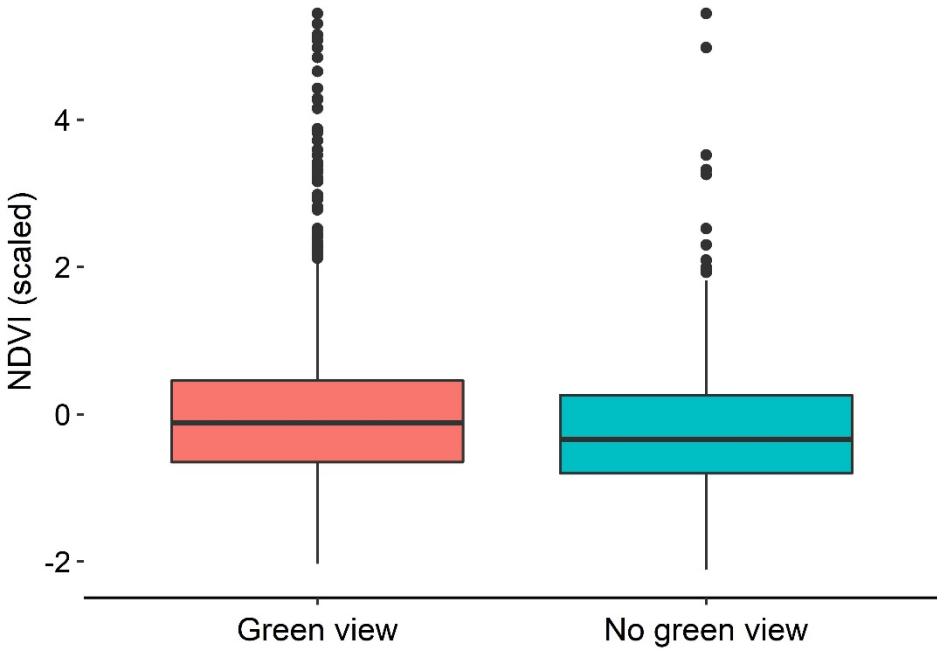

Supplement: EAP-31-0-s001.pdf [file EAP-31-0-s001.pdf]
